# Supplementary material for: Novel imidazolium-based poly(ionic liquid)s with different counterions for self-healing
Source: Royal Society of Chemistry journal article supplement (doi:10.1039/c7ta06793c), 2017-01-01
Supplement: c7ta06793c1.pdf [file c7ta06793c1.pdf]

## Supporting Information

# Novel Imidazolium-Based Poly(ionic liquid)s with Different Counter Ions for Self-Healing

Jing Cui,<sup>a</sup> Feng-Min Nie,<sup>a</sup> Ji-Xing Yang,<sup>a</sup> Li Pan,<sup>\*a</sup> ZheMa,<sup>a</sup> Yue-Sheng Li<sup>a,b</sup>

<sup>a</sup>Tianjin Key Lab Composite & Functional Materials, School of Materials Science and Engineering, Tianjin University, Tianjin 300350, China

<sup>b</sup> Collaborative Innovation Center of Chemical Science and Engineering (Tianjin), Tianjin 300072, China

---

\*Corresponding Author. E-mail: lilypan@tju.edu.cn

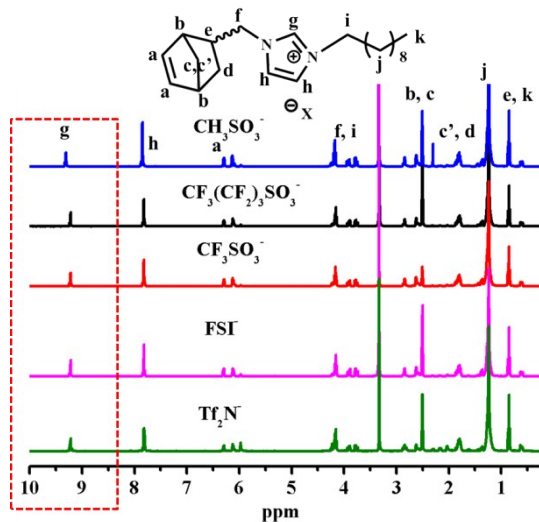

**Fig. S1.** The  $^1\text{H}$  NMR spectra of imidazolium-based norbornene derivatives with different counter ions (methyl sulfoxide- $d_6$ ).

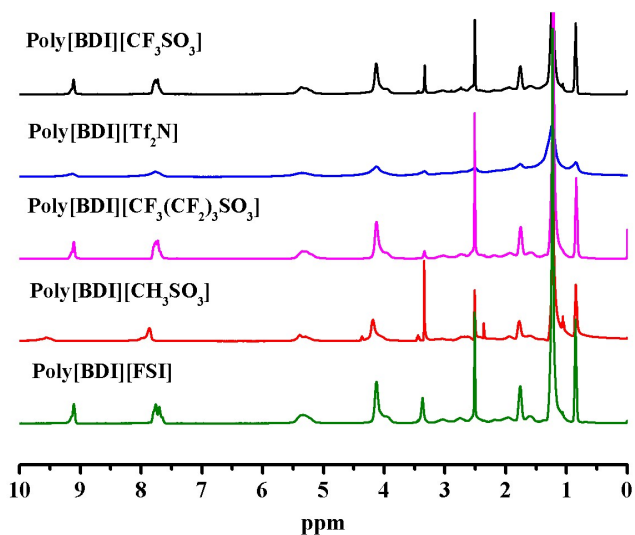

**Fig. S2.** The  $^1\text{H}$  NMR spectra of PILs (methyl sulfoxide- $d_6$ ).

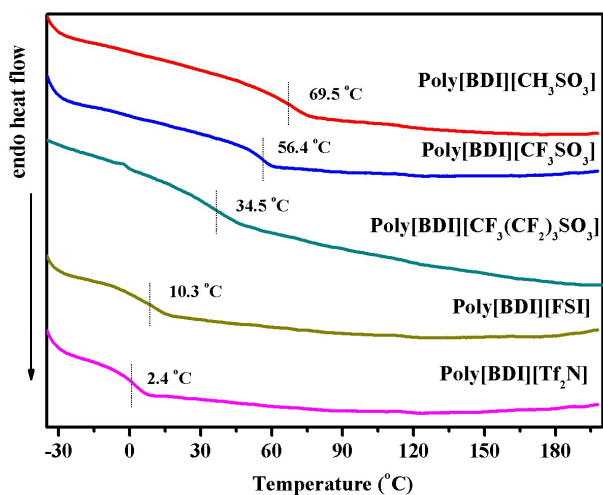

**Fig. S3.** DSC curves of PILs.

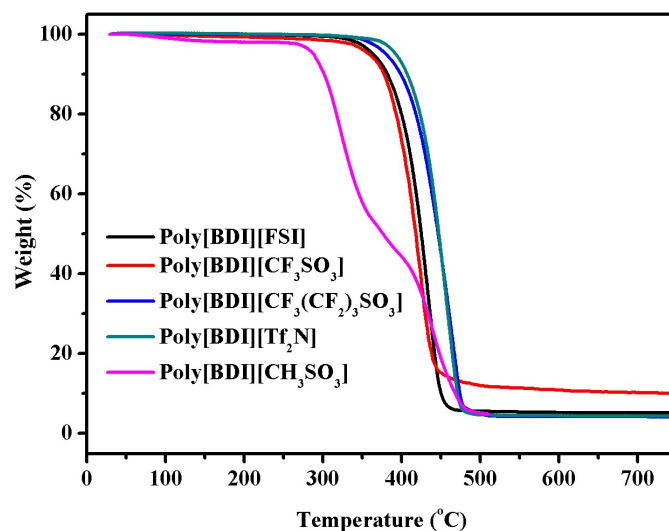

**Fig. S4.** TGA curves of PILs.

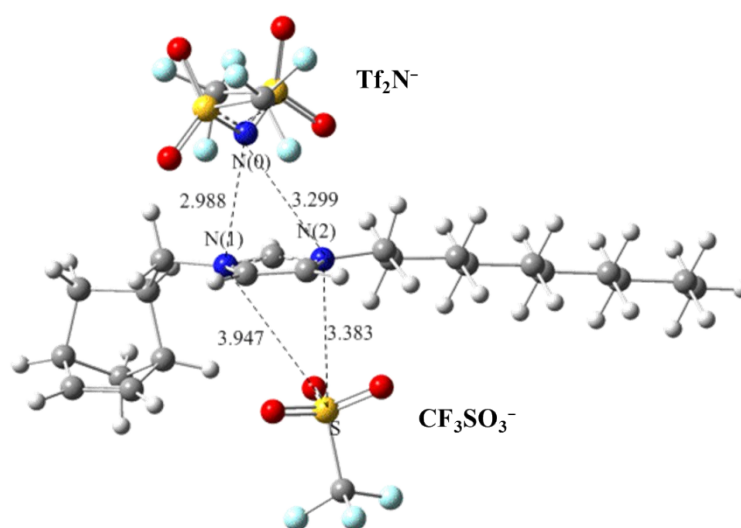

**Fig. S5.** An optimized model for ion aggregation of an imidazolium cation surrounded by a  $\text{Tf}_2\text{N}^-$  counter ion and a  $\text{CF}_3\text{SO}_3^-$  counter ion.

**Table S1.** Interaction Energies <sup>a</sup> for 3-Bicyclo[2.2.1]hept-5-en-2-ylmethyl-1-decyl-3H-imidazolium ([BDI]) with two different counter ions ( $\text{Tf}_2\text{N}^-$  and  $\text{M}^-$ ) shown in Fig. S5.

| $\text{\AA}/(\text{kcal/mol})$ | $\text{CH}_3\text{SO}_3^-$ | $\text{CF}_3\text{SO}_3^-$ | $\text{CF}_3(\text{CF}_2)_3\text{SO}_3^-$ |
|--------------------------------|----------------------------|----------------------------|-------------------------------------------|
| N(0)-N(1)                      | 3.014                      | 2.988                      | 2.982                                     |
| N(0)-N(2)                      | 3.339                      | 3.299                      | 3.285                                     |
| S-N(1)                         | 3.973                      | 3.947                      | 3.963                                     |
| S-N(2)                         | 3.408                      | 3.383                      | 3.401                                     |
| $\Delta E$                     | -114.4                     | -108.8                     | -107.7                                    |

<sup>a</sup> All calculations were carried out at the level of M05-2X/6-31+G(d) planted in Gaussian 09 program.

**Table S2.** Mechanical properties of polymer blends and Poly[BDI][FSI].<sup>a</sup>

| Sample                                                                         | Young's modulus (MPa) <sup>b</sup> | Yield stress (MPa) | Breaking stress (MPa) | Breaking strain (%) |
|--------------------------------------------------------------------------------|------------------------------------|--------------------|-----------------------|---------------------|
| Poly[BDI][FSI]                                                                 | 7.76±0.49                          | × <sup>c</sup>     | 3.98±0.25             | 1843±58             |
| Poly[BDI][CH <sub>3</sub> SO <sub>3</sub> ]-30                                 | 42.20±3.62                         | 3.90±0.08          | 6.97±0.44             | 722±25              |
| Poly[BDI][CH <sub>3</sub> SO <sub>3</sub> ]-50                                 | 146.00±2.94                        | 13.15±0.57         | 11.48±0.34            | 481±15              |
| Poly[BDI][CF <sub>3</sub> SO <sub>3</sub> ]-30                                 | 14.68±1.80                         | ×                  | 4.49±0.13             | 1170±23             |
| Poly[BDI][CF <sub>3</sub> SO <sub>3</sub> ]-50                                 | 49.00±2.16                         | 4.60±0.21          | 7.12±0.16             | 705±33              |
| Poly[BDI][CF <sub>3</sub> SO <sub>3</sub> ]-70                                 | 90.70±5.86                         | 9.25±0.67          | 9.35±0.40             | 537±8               |
| Poly[BDI][CF <sub>3</sub> (CF <sub>2</sub> ) <sub>3</sub> SO <sub>3</sub> ]-30 | 13.78±1.06                         | ×                  | 3.58±0.15             | 1238±33             |
| Poly[BDI][CF <sub>3</sub> (CF <sub>2</sub> ) <sub>3</sub> SO <sub>3</sub> ]-50 | 43.05±2.05                         | 3.41±0.01          | 6.24±0.19             | 707±27              |

<sup>a</sup> Strain rate = 100 mm min<sup>-1</sup>, room temperature; <sup>b</sup> Young's modulus, calculated from the initial slope of stress-strain curves (strain < 5%); <sup>c</sup> no detected.

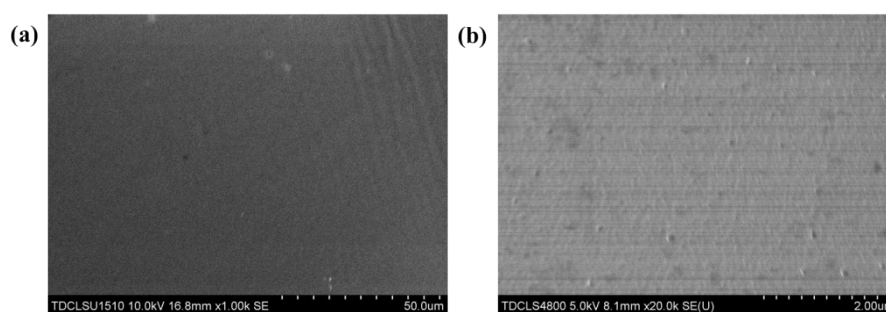**Fig. S6.** SEM photograph of Poly[BDI][Tf<sub>2</sub>N][CF<sub>3</sub>SO<sub>3</sub>]-50.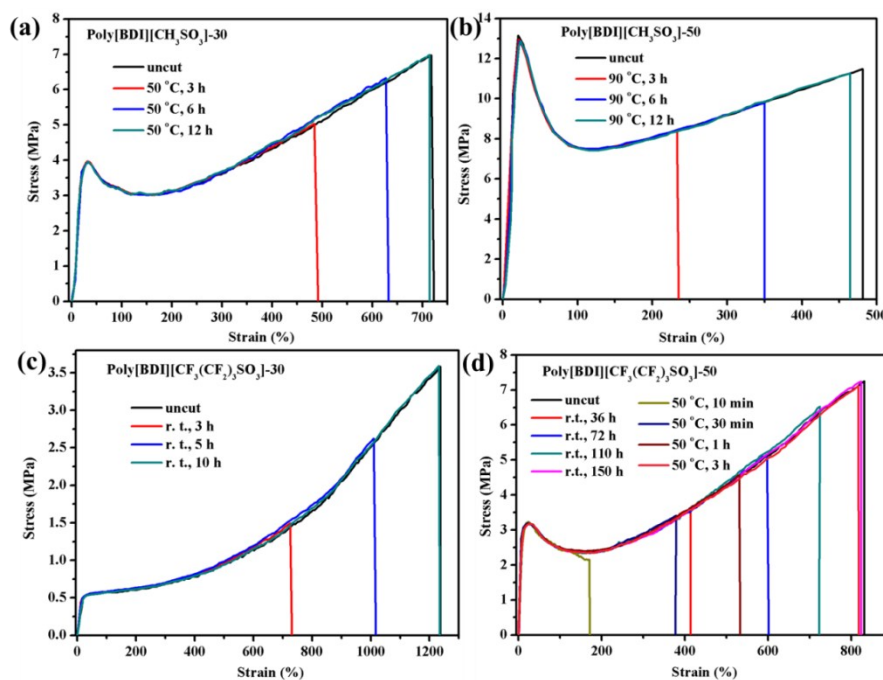**Fig. S7.** Stress-strain curves of the original and heated polymer blends. (a) Poly[BDI][CH<sub>3</sub>SO<sub>3</sub>]-30; (b) Poly[BDI][CH<sub>3</sub>SO<sub>3</sub>]-50; (c) Poly[BDI][CF<sub>3</sub>(CF<sub>2</sub>)<sub>3</sub>SO<sub>3</sub>]-30; (d)

Poly[BDI][CF<sub>3</sub>(CF<sub>2</sub>)<sub>3</sub>SO<sub>3</sub>]-50.

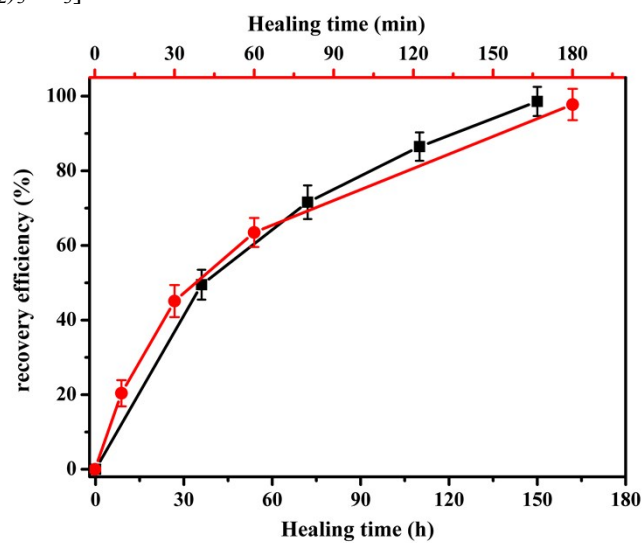

**Fig. S8.** Plots of the recovery efficiency of fracture strain as a function healing time for Poly[BDI][Tf<sub>2</sub>N][CF<sub>3</sub>(CF<sub>2</sub>)<sub>3</sub>SO<sub>3</sub>]-50 at different temperatures, black plot represented room temperature and red plot represented 50 °C; Error bars denoted the standard deviations from at least five experiments
